# Supplementary material for: Phase 1 Study to Evaluate the Safety of Reducing the Prophylactic Dose of Dexamethasone around Docetaxel Infusion in Patients with Prostate and Breast Cancer
Source: MDPI journal article supplement (doi:10.3390/cancers15061691), 2023-03-09
Supplement: s1 [file s1]

# Supplementary materials: Phase 1 Study to Evaluate the Safety of Reducing the Prophylactic Dose of Dexamethasone around Docetaxel Infusion in Patients with Prostate and Breast Cancer

Rieneke T. Lugtenberg <sup>1,\*†</sup>, Stefanie de Groot <sup>1,†</sup>, Danny Houtsma <sup>2</sup>, Vincent O. Dezentjé <sup>3,4</sup>, Annelie J. E. Vulink <sup>3</sup>, Maarten J. Fischer <sup>5</sup>, Johanneke E. A. Portielje <sup>1,2</sup>, Jacobus J.M. van der Hoeven <sup>1</sup>, Hans Gelderblom <sup>1</sup>, Hanno Pijl <sup>6</sup> and Judith R. Kroep <sup>1</sup>

**Table S1.** Differences between dose levels for Glucose, Insulin and IGF-1 levels in patient with prostate cancer.

| Dose level      | 1 (n=5)       | 2 (n=6)       | 3A (n=6)      | 3B (n=5)      | p-value** |
|-----------------|---------------|---------------|---------------|---------------|-----------|
| Glucose mmol/L* | 6.92 (2.77)   | 6.57 (0.76)   | 7.01 (1.99)   | 5.87 (1.84)   | 0.77      |
| Insulin mIU/L*  | 36.60 (39.39) | 32.23 (23.64) | 47.42 (72.56) | 27.13 (33.23) | 0.67      |
| IGF-1 nmol/L*   | 16.10 (6.94)  | 16.36 (8.89)  | 16.86 (46.54) | 18.03 (11.47) | 0.92      |

\* Median (IQR), \*\*Kruskal Wallis test; Abbreviations: IGF-1: Insulin-like growth factor.

**Table S2.** Quality of Life scores for evaluable patients at baseline (Mean, SD).

| Prostate cancer        | Cohort 1 (n=6) | Cohort 2 (n=6) | Cohort 3 (n=12) | p value |
|------------------------|----------------|----------------|-----------------|---------|
| EORTC QoL-C30 domains  |                |                |                 |         |
| Global Health          | 65.3 (33.9)    | 50.0 (26.4)    | 81.3 (17.9)     | 0.15    |
| Physical functioning   | 73.3 (29.5)    | 80.0 (14.6)    | 92.8 (12.2)     | 0.20    |
| Role functioning       | 63.9 (40.0)    | 72.2 (34.4)    | 88.9 (20.5)     | 0.34    |
| Emotional functioning  | 80.6 (12.5)    | 84.7 (17.8)    | 84.0 (14.4)     | 0.44    |
| Cognitive functioning  | 72.2 (37.5)    | 80.6 (16.4)    | 88.9 (16.4)     | 0.38    |
| Social functioning     | 66.7 (42.2)    | 83.3 (21.1)    | 90.3 (20.7)     | 0.54    |
| EORTC QoL-C30 symptoms |                |                |                 |         |
|                        | 38.9 (37.0)    |                |                 |         |
| Fatigue                | 5.6 (8.6)      | 27.8 (26.1)    | 13.0 (17.6)     | 0.62    |
| Nausea                 | 25.0 (39.1)    | 0.0 (0.0)      | 0.0 (0.0)       | 0.04    |
| Pain                   | 11.1 (17.2)    | 25.0 (25.3)    | 5.6 (19.2)      | 0.08    |
| Dyspnea                | 33.3 (42.2)    | 27.8 (25.1)    | 13.9 (30.0)     | 0.35    |
| Insomnia               | 22.2 (40.4)    | 22.2 (27.2)    | 16.7 (30.2)     | 0.73    |
| Appetite loss          | 5.6 (13.6)     | 0.0 (0.0)      | 5.6 (13.0)      | 0.36    |
| Constipation           | 16.7 (40.8)    | 11.1 (17.2)    | 2.8 (9.6)       | 0.41    |
| Diarrhea               | 22.2 (40.4)    | 5.6 (13.6)     | 8.3 (15.1)      | 0.34    |
| Financial difficulties |                | 5.6 (13.6)     | 5.6 (13.0)      | 0.53    |
| Breast cancer          | Cohort 1 (n=3) | Cohort 2 (n=6) | Cohort 3 (n=1)  | p value |
| EORTC QoL-C30 domains  |                |                |                 |         |
| Global Health          | 66.7 (16.7)    | 73.6 (26.0)    | 66.7            | 0.35    |
| Physical functioning   | 77.8 (20.4)    | 86.7 (8.2)     | 80.0            | 0.40    |
| Role functioning       | 55.6 (9.6)     | 58.3 (32.9)    | 33.3            | 0.12    |
| Emotional functioning  | 91.7 (8.3)     | 77.8 (21.5)    | 66.7            | 0.08    |

|                                                                                                              |             |             |      |      |
|--------------------------------------------------------------------------------------------------------------|-------------|-------------|------|------|
| Cognitive functioning                                                                                        | 77.8 (9.6)  | 75.0 (17.5) | 66.7 | 0.77 |
| Social functioning                                                                                           | 88.9 (19.2) | 69.4 (38.6) | 66.7 | 0.40 |
| EORTC QoL-C30 symptoms                                                                                       |             |             |      |      |
| Fatigue                                                                                                      | 37.0 (17.0) | 50.0 (33.5) | 55.6 | 0.82 |
| Nausea                                                                                                       | 11.1 (9.6)  | 20.0 (21.7) | 0.0  | 0.68 |
| Pain                                                                                                         | 27.8 (9.6)  | 25.0 (37.6) | 0.0  | 0.21 |
| Dyspnea                                                                                                      | 11.1 (19.2) | 38.9 (25.1) | 33.3 | 0.41 |
| Insomnia                                                                                                     | 55.6 (19.2) | 33.3 (36.5) | 33.3 | 0.29 |
| Appetite loss                                                                                                | 0.0 (0.0)   | 33.3 (21.1) | 66.7 | 0.03 |
| Constipation                                                                                                 | 55.6 (50.9) | 22.2 (27.2) | 0.0  | 0.57 |
| Diarrhea                                                                                                     | 11.1 (19.2) | 11.1 (17.2) | 33.3 | 0.44 |
| Financial difficulties                                                                                       | 22.2 (19.2) | 5.6 (13.6)  | 0.0  | 0.24 |
| Abbreviations: EORTC: European Organization for Research and Treatment of Cancer-Core, QoL: Quality of Life. |             |             |      |      |

**Table S3.** Changes in scores from baseline for patients with prostate cancer.

|                       |          | Questionnaire time points |                |                |      | p-value |                |
|-----------------------|----------|---------------------------|----------------|----------------|------|---------|----------------|
|                       |          | Baseline                  | After 3 cycles | After 6 cycles | Time | Cohort  | Time by Cohort |
| Global Health         | Cohort 1 | 68.3                      | 86.1           | 70.0           | 0.84 | 0.05    | 0.63           |
|                       | Cohort 2 | 36.11                     | 45.8           | 54.2           |      |         |                |
|                       | Cohort 3 | 78.3                      | 77.1           | 72.9           |      |         |                |
| Functioning scales    |          |                           |                |                |      |         |                |
| Physical functioning  | Cohort 1 | 77.3                      | 93.3           | 81.3           | 0.03 | 0.11    | 0.03           |
|                       | Cohort 2 | 71.1                      | 56.7           | 60.0           |      |         |                |
|                       | Cohort 3 | 91.3                      | 90.8           | 74.1           |      |         |                |
| Role functioning      | Cohort 1 | 70.0                      | 77.8           | 66.7           | 0.06 | 0.12    | 0.06           |
|                       | Cohort 2 | 44.4                      | 16.7           | 33.3           |      |         |                |
|                       | Cohort 3 | 86.7                      | 79.2           | 60.4           |      |         |                |
| Emotional functioning | Cohort 1 | 83.3                      | 83.3           | 81.7           | 0.77 | 0.31    | 0.81           |
|                       | Cohort 2 | 72.2                      | 70.8           | 58.3           |      |         |                |
|                       | Cohort 3 | 83.3                      | 85.4           | 82.3           |      |         |                |
| Cognitive Functioning | Cohort 1 | 66.7                      | 88.9           | 73.3           | 0.44 | 0.34    | 0.44           |
|                       | Cohort 2 | 72.2                      | 75.0           | 91.7           |      |         |                |
|                       | Cohort 3 | 86.7                      | 91.7           | 83.3           |      |         |                |
| Social functioning    | Cohort 1 | 73.3                      | 88.9           | 73.3           | 0.49 | 0.34    | 0.59           |
|                       | Cohort 2 | 77.8                      | 50.0           | 58.3           |      |         |                |
|                       | Cohort 3 | 91.7                      | 89.6           | 83.3           |      |         |                |
| Symptoms              |          |                           |                |                |      |         |                |
| Fatigue               | Cohort 1 | 35.6                      | 40.7           | 48.9           | 0.02 | 0.13    | 0.06           |
|                       | Cohort 2 | 48.1                      | 61.1           | 66.7           |      |         |                |
|                       | Cohort 3 | 14.4                      | 23.8           | 37.5           |      |         |                |
| Nausea                | Cohort 1 | 6.7                       | 0.0            | 6.7            | 0.03 | 0.20    | 0.04           |
|                       | Cohort 2 | 0.0                       | 0.0            | 16.7           |      |         |                |
|                       | Cohort 3 | 0.0                       | 0.0            | 6.3            |      |         |                |
| Pain                  | Cohort 1 | 30.0                      | 5.6            | 3.3            | 0.53 | 0.23    | 0.06           |
|                       | Cohort 2 | 38.9                      | 33.3           | 50.0           |      |         |                |

|                        |          |      |      |      |       |      |      |
|------------------------|----------|------|------|------|-------|------|------|
|                        | Cohort 3 | 6.7  | 12.5 | 35.4 |       |      |      |
| Dyspnea                | Cohort 1 | 13.3 | 0.0  | 33.3 |       |      |      |
|                        | Cohort 2 | 33.3 | 16.7 | 50.0 | <0.01 | 0.39 | 0.02 |
|                        | Cohort 3 | 13.3 | 8.3  | 33.3 |       |      |      |
|                        |          |      |      |      |       |      |      |
| Insomnia               | Cohort 1 | 26.7 | 33.3 | 33.3 |       |      |      |
|                        | Cohort 2 | 33.3 | 16.7 | 66.7 | 0.18  | 0.60 | 0.40 |
|                        | Cohort 3 | 20.0 | 8.3  | 33.3 |       |      |      |
|                        |          |      |      |      |       |      |      |
| Appetite loss          | Cohort 1 | 26.7 | 0.0  | 20.0 |       |      |      |
|                        | Cohort 2 | 0.0  | 0.0  | 50.0 | 0.69  | 0.16 | 0.04 |
|                        | Cohort 3 | 6.7  | 0.0  | 12.5 |       |      |      |
|                        |          |      |      |      |       |      |      |
| Constipation           | Cohort 1 | 6.7  | 0.0  | 6.7  |       |      |      |
|                        | Cohort 2 | 22.2 | 0.0  | 16.7 | 0.56  | 0.17 | 0.93 |
|                        | Cohort 3 | 3.33 | 4.2  | 4.2  |       |      |      |
|                        |          |      |      |      |       |      |      |
| Diarrhea               | Cohort 1 | 20.0 | 11.1 | 20.0 |       |      |      |
|                        | Cohort 2 | 0.0  | 0.0  | 0.0  | 0.76  | 0.45 | 0.98 |
|                        | Cohort 3 | 10.0 | 4.2  | 12.5 |       |      |      |
|                        |          |      |      |      |       |      |      |
| Financial difficulties | Cohort 1 | 26.7 | 0.0  | 13.3 |       |      |      |
|                        | Cohort 2 | 11.1 | 0.0  | 0.0  | 0.08  | 0.10 | 0.02 |
|                        | Cohort 3 | 3.33 | 4.2  | 0.0  |       |      |      |
|                        |          |      |      |      |       |      |      |

P Time: changes of QoL scores over time; P Cohort: differences in QoL scores between cohorts; P Time by Cohort: different effects between cohorts over time.

**Table S4.** (A) Occurrence of hypersensitivity reactions (HSR) and fluid retention in evaluable patients with breast cancer; (B) Occurrence of hypersensitivity reactions (HSR) and fluid retention in evaluable patients with prostate cancer.

| (A) Occurrence of hypersensitivity reactions (HSR) and fluid retention in evaluable patients with breast cancer |        |                    |                 |              |                                           |                     |                              |                 |                    |                             |                                |
|-----------------------------------------------------------------------------------------------------------------|--------|--------------------|-----------------|--------------|-------------------------------------------|---------------------|------------------------------|-----------------|--------------------|-----------------------------|--------------------------------|
| Patient                                                                                                         | Cohort | TNM classification | Receptor status | Treatment    | Docetaxel treatment                       | Cycles of Docetaxel | Cumulative dose of Docetaxel | HSR (any grade) | HSR (grade III/IV) | Fluid retention (any grade) | Fluid retention (grade III/IV) |
| 1102                                                                                                            | 1      | T2N0M0             | TNBC            | Neo-adjuvant | Monotherapy 100 mg/m <sup>2</sup>         | 4                   | 375 mg/m <sup>2</sup>        | -               | -                  | -                           | -                              |
| 1104                                                                                                            | 1      | T1N0M0             | ER+, PR/Her2-   | Adjuvant     | Monotherapy 100 mg/m <sup>2</sup>         | 4                   | 400 mg/m <sup>2</sup>        | -               | -                  | -                           | -                              |
| 1105                                                                                                            | 1      | T2N1M0             | ER/PR+, Her2-   | Adjuvant     | Monotherapy 100 mg/m <sup>2</sup>         | 4                   | 340 mg/m <sup>2</sup>        | -               | -                  | -                           | -                              |
| 1106                                                                                                            | 1      | T2N1M0             | ER/PR+, Her2-   | Neo-adjuvant | Monotherapy 100 mg/m <sup>2</sup>         | 4                   | 340 mg/m <sup>2</sup>        | -               | -                  | -                           | -                              |
| 1107                                                                                                            | 1      | T1N0M0             | ER/PR+, Her2-   | Adjuvant     | Monotherapy 100 mg/m <sup>2</sup>         | 4                   | 325 mg/m <sup>2</sup>        | -               | -                  | -                           | -                              |
| 1108                                                                                                            | 1      | T1N1M0             | ER/PR+, Her2-   | Adjuvant     | Monotherapy 100 mg/m <sup>2</sup>         | 4                   | 325 mg/m <sup>2</sup>        | -               | -                  | Grade 1 edema               | -                              |
| 1201                                                                                                            | 2      | T2N1M0             | ER/PR+, Her2-   | Neo-adjuvant | Monotherapy 100 mg/m <sup>2</sup>         | 4                   | 340 mg/m <sup>2</sup>        | -               | -                  | Grade 2 edema               | -                              |
| 1202                                                                                                            | 2      | T3N3M0             | TNBC            | Neo-adjuvant | Monotherapy 100 mg/m <sup>2</sup>         | 4                   | 307 mg/m <sup>2</sup>        | -               | -                  | -                           | -                              |
| 1203                                                                                                            | 2      | T2N0M0             | TNBC            | Neo-adjuvant | Monotherapy 100 mg/m <sup>2</sup>         | 4                   | 400 mg/m <sup>2</sup>        | -               | -                  | -                           | -                              |
| 1204                                                                                                            | 2      | T1N0M)             | ER/PR+, Her2-   | Adjuvant     | Combination therapy* 75 mg/m <sup>2</sup> | 4                   | 300 mg/m <sup>2</sup>        | -               | -                  | -                           | -                              |
| 1205                                                                                                            | 2      | T2N1M0             | ER+, PR/Her2-   | Neo-adjuvant | Monotherapy 100 mg/m <sup>2</sup>         | 1                   | 100 mg/m <sup>2</sup>        | -               | -                  | -                           | -                              |
| 1206                                                                                                            | 2      | T2N0M0             | TNBC            | Neo-adjuvant | Monotherapy 100 mg/m <sup>2</sup>         | 4                   | 400 mg/m <sup>2</sup>        | -               | -                  | -                           | -                              |
| 1303                                                                                                            | 3      | T1N1M0             | ER+, PR/Her2-   | Neo-adjuvant | Monotherapy 100 mg/m <sup>2</sup>         | 6                   | 600 mg/m <sup>2</sup>        | -               | -                  | -                           | -                              |

| 1304                                                                                                                     | 3      | T2N1M1  | ER/PR+,<br>Her2+ | Palliative                               | Combination<br>therapy**<br>100 mg/m <sup>2</sup> | 6                                         | 450 mg/m <sup>2</sup> | -                        | -                                         | -                                      | - |
|--------------------------------------------------------------------------------------------------------------------------|--------|---------|------------------|------------------------------------------|---------------------------------------------------|-------------------------------------------|-----------------------|--------------------------|-------------------------------------------|----------------------------------------|---|
| <b>(B) Occurrence of hypersensitivity reactions (HSR) and fluid retention in evaluable patients with prostate cancer</b> |        |         |                  |                                          |                                                   |                                           |                       |                          |                                           |                                        |   |
| Patient                                                                                                                  | Cohort | Disease | Treatment        | Docetaxel<br>treatment                   | Cycles of<br>Docetaxel                            | Cumula-<br>tive dose<br>of Docet-<br>axel | HSR<br>(any grade)    | HSR<br>(grade<br>III/IV) | Fluid<br>reten-<br>tion<br>(any<br>grade) | Fluid reten-<br>tion (grade<br>III/IV) |   |
| 2101                                                                                                                     | 1      | mCRPC   | Palliative       | Monother-<br>apy 75<br>mg/m <sup>2</sup> | 1                                                 | 75 mg/m <sup>2</sup>                      | -                     | -                        | -                                         | -                                      |   |
| 2102                                                                                                                     | 1      | mCRPC   | Palliative       | Monother-<br>apy 75<br>mg/m <sup>2</sup> | 9                                                 | 645 mg/m <sup>2</sup>                     | -                     | -                        | -                                         | -                                      |   |
| 2103                                                                                                                     | 1      | mHSPC   | Palliative       | Monother-<br>apy 75<br>mg/m <sup>2</sup> | 6                                                 | 450 mg/m <sup>2</sup>                     | -                     | -                        | -                                         | -                                      |   |
| 2104                                                                                                                     | 1      | mHSPC   | Palliative       | Monother-<br>apy 75<br>mg/m <sup>2</sup> | 6                                                 | 450 mg/m <sup>2</sup>                     | -                     | -                        | -                                         | -                                      |   |
| 2105                                                                                                                     | 1      | mCRPC   | Palliative       | Monother-<br>apy 75<br>mg/m <sup>2</sup> | 8                                                 | 600 mg/m <sup>2</sup>                     | -                     | -                        | -                                         | -                                      |   |
| 2106                                                                                                                     | 1      | mHSPC   | Palliative       | Monother-<br>apy 75<br>mg/m <sup>2</sup> | 6                                                 | 450 mg/m <sup>2</sup>                     | -                     | -                        | Grade 2<br>edema                          | -                                      |   |
| 2201                                                                                                                     | 2      | mCRPC   | Palliative       | Monother-<br>apy 75<br>mg/m <sup>2</sup> | 6                                                 | 450 mg/m <sup>2</sup>                     | -                     | -                        | -                                         | -                                      |   |
| 2202                                                                                                                     | 2      | mCRPC   | Palliative       | Monother-<br>apy 75<br>mg/m <sup>2</sup> | 5                                                 | 375 mg/m <sup>2</sup>                     | -                     | -                        | -                                         | -                                      |   |
| 2203                                                                                                                     | 2      | mCRPC   | Palliative       | Monother-<br>apy 75<br>mg/m <sup>2</sup> | 6                                                 | 450 mg/m <sup>2</sup>                     | -                     | -                        | -                                         | -                                      |   |
| 2204                                                                                                                     | 2      | mCRPC   | Palliative       | Monother-<br>apy 75<br>mg/m <sup>2</sup> | 3                                                 | 225 mg/m <sup>2</sup>                     | -                     | -                        | -                                         | -                                      |   |
| 2205                                                                                                                     | 2      | mCRPC   | Palliative       | Monother-<br>apy 75<br>mg/m <sup>2</sup> | 6                                                 | 450 mg/m <sup>2</sup>                     | -                     | -                        | -                                         | -                                      |   |
| 2206                                                                                                                     | 2      | mHSPC   | Palliative       | Monother-<br>apy 75<br>mg/m <sup>2</sup> | 6                                                 | 450 mg/m <sup>2</sup>                     | Grade 1**             | -                        | -                                         | -                                      |   |
| 2207                                                                                                                     | 2      | mHSPC   | Palliative       | Monother-<br>apy 75<br>mg/m <sup>2</sup> | 6                                                 | 450 mg/m <sup>2</sup>                     |                       |                          |                                           |                                        |   |
| 2301                                                                                                                     | 3A     | mCRPC   | Palliative       | Monother-<br>apy 75<br>mg/m <sup>2</sup> | 5                                                 | 281 mg/m <sup>2</sup>                     |                       |                          |                                           |                                        |   |
| 2302                                                                                                                     | 3A     | mHSPC   | Palliative       | Monother-<br>apy 75<br>mg/m <sup>2</sup> | 6                                                 | 450 mg/m <sup>2</sup>                     |                       |                          |                                           |                                        |   |
| 2303                                                                                                                     | 3A     | mHSPC   | Palliative       | Monother-<br>apy 75<br>mg/m <sup>2</sup> | 6                                                 | 450 mg/m <sup>2</sup>                     |                       |                          |                                           |                                        |   |
| 2304                                                                                                                     | 3A     | mHSPC   | Palliative       | Monother-                                | 6                                                 | 450 mg/m <sup>2</sup>                     | -                     | -                        | Grade 1                                   | -                                      |   |

|      |    |       |            | apy 75<br>mg/m <sup>2</sup>              |   |                       |   |   | edema            |   |
|------|----|-------|------------|------------------------------------------|---|-----------------------|---|---|------------------|---|
| 2305 | 3A | mHSPC | Palliative | Monother-<br>apy 75<br>mg/m <sup>2</sup> | 6 | 450 mg/m <sup>2</sup> | - | - | -                | - |
| 2306 | 3A | mCRPC | Palliative | Monother-<br>apy 75<br>mg/m <sup>2</sup> | 2 | 150 mg/m <sup>2</sup> | - |   |                  |   |
| 2401 | 3B | mHSPC | Palliative | Monother-<br>apy 75<br>mg/m <sup>2</sup> | 6 | 450 mg/m <sup>2</sup> |   |   |                  |   |
| 2402 | 3B | mHSPC | Palliative | Monother-<br>apy 75<br>mg/m <sup>2</sup> | 5 | 356 mg/m <sup>2</sup> |   |   |                  |   |
| 2403 | 3B | mHSPC | Palliative | Monother-<br>apy 75<br>mg/m <sup>2</sup> | 6 | 450 mg/m <sup>2</sup> | - | - | Grade 1<br>edema | - |
| 2405 | 3B | mHSPC | Palliative | Monother-<br>apy 75<br>mg/m <sup>2</sup> | 6 | 450 mg/m <sup>2</sup> | - | - | Grade 2<br>edema | - |
| 2407 | 3B | mHSPC | Palliative | Monother-<br>apy 75<br>mg/m <sup>2</sup> | 6 | 450 mg/m <sup>2</sup> | - | - | -                | - |
| 2409 | 3B | mHSPC | Palliative | Monother-<br>apy 75<br>mg/m <sup>2</sup> | 6 | 450 mg/m <sup>2</sup> | - | - | -                | - |

(A)\* Docetaxel – cyclophosphamide \*\* Docetaxel – trastuzumab – pertuzumab; Abbreviations: TNBC: triple negative breast cancer; ER: Estrogen receptor; PR: progesterone receptor; Her2: human epidermal growth factor receptor 2; (B)\*\* After a grade 1 HSR at the first cycle of docetaxel this patient decided to use the normal dosage of dexamethasone in the consequent cycles and he went off study; Abbreviations: mHSPC: metastatic Hormone-sensitive prostate cancer; mCRPC: metastatic castration-resistant prostate cancer.
